# Supplementary material
Source: Elsevier journal article supplement (https://comptes-rendus.academie-sciences.fr/geoscience/article/10.1016/j.crte.2007.03.006/file/attach/mmc3.pdf)
Supplement: mmc3 [file mmc3.pdf]

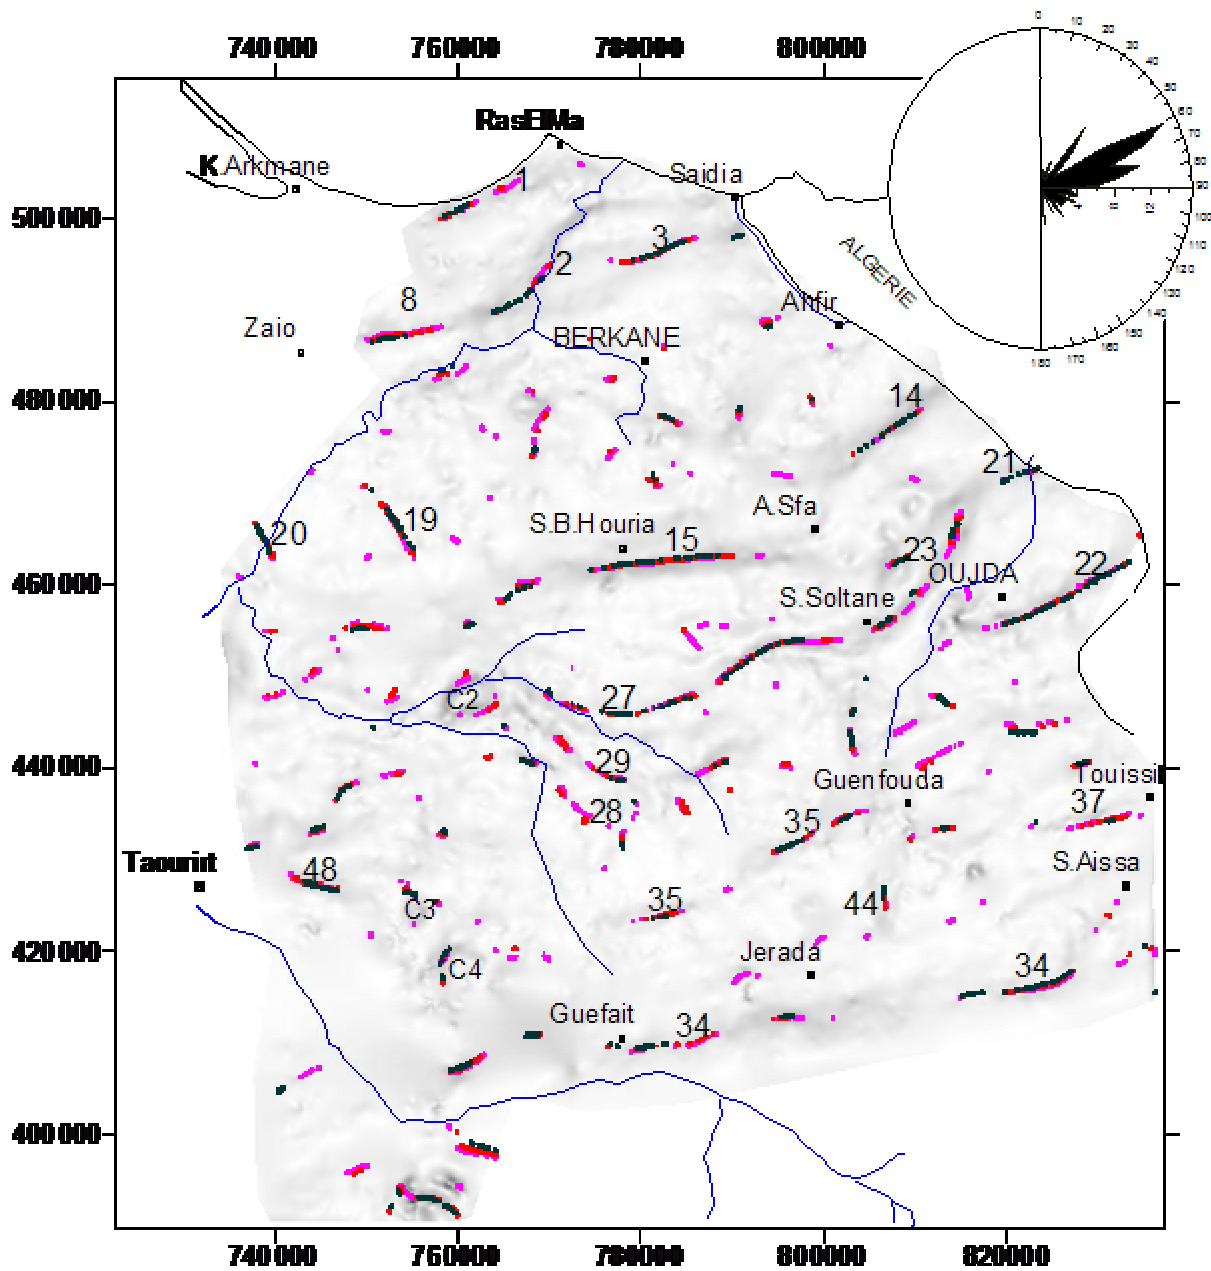

Fig.4 Principales failles soulignées par le regroupement des maxima du gradient horizontal des cartes prolongées vers le haut à partir de 2000m d'altitude et rosace des fréquences.  
 ● maxima localisés sur la carte prolongée à 2000m ; ● 2500m ; ● 3000m.

Fig.4 Major faults outlined from horizontal gradient maxima of the Bouguer anomaly upward continued to 2000m, 2500m and 3000m, and rose diagram.
